# Supplementary material for: Efficacy and Safety of the Combination of Superoxide Dismutase, Alpha Lipoic Acid, Vitamin B12, and Carnitine for 12 Months in Patients with Diabetic Neuropathy
Source: PubMed Central journal article supplement (PMC7690794; doi:10.3390/nu12113254), 2020-10-23

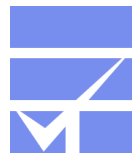

# CONSORT

TRANSPARENT REPORTING of TRIALS

## CONSORT 2010 Flow Diagram

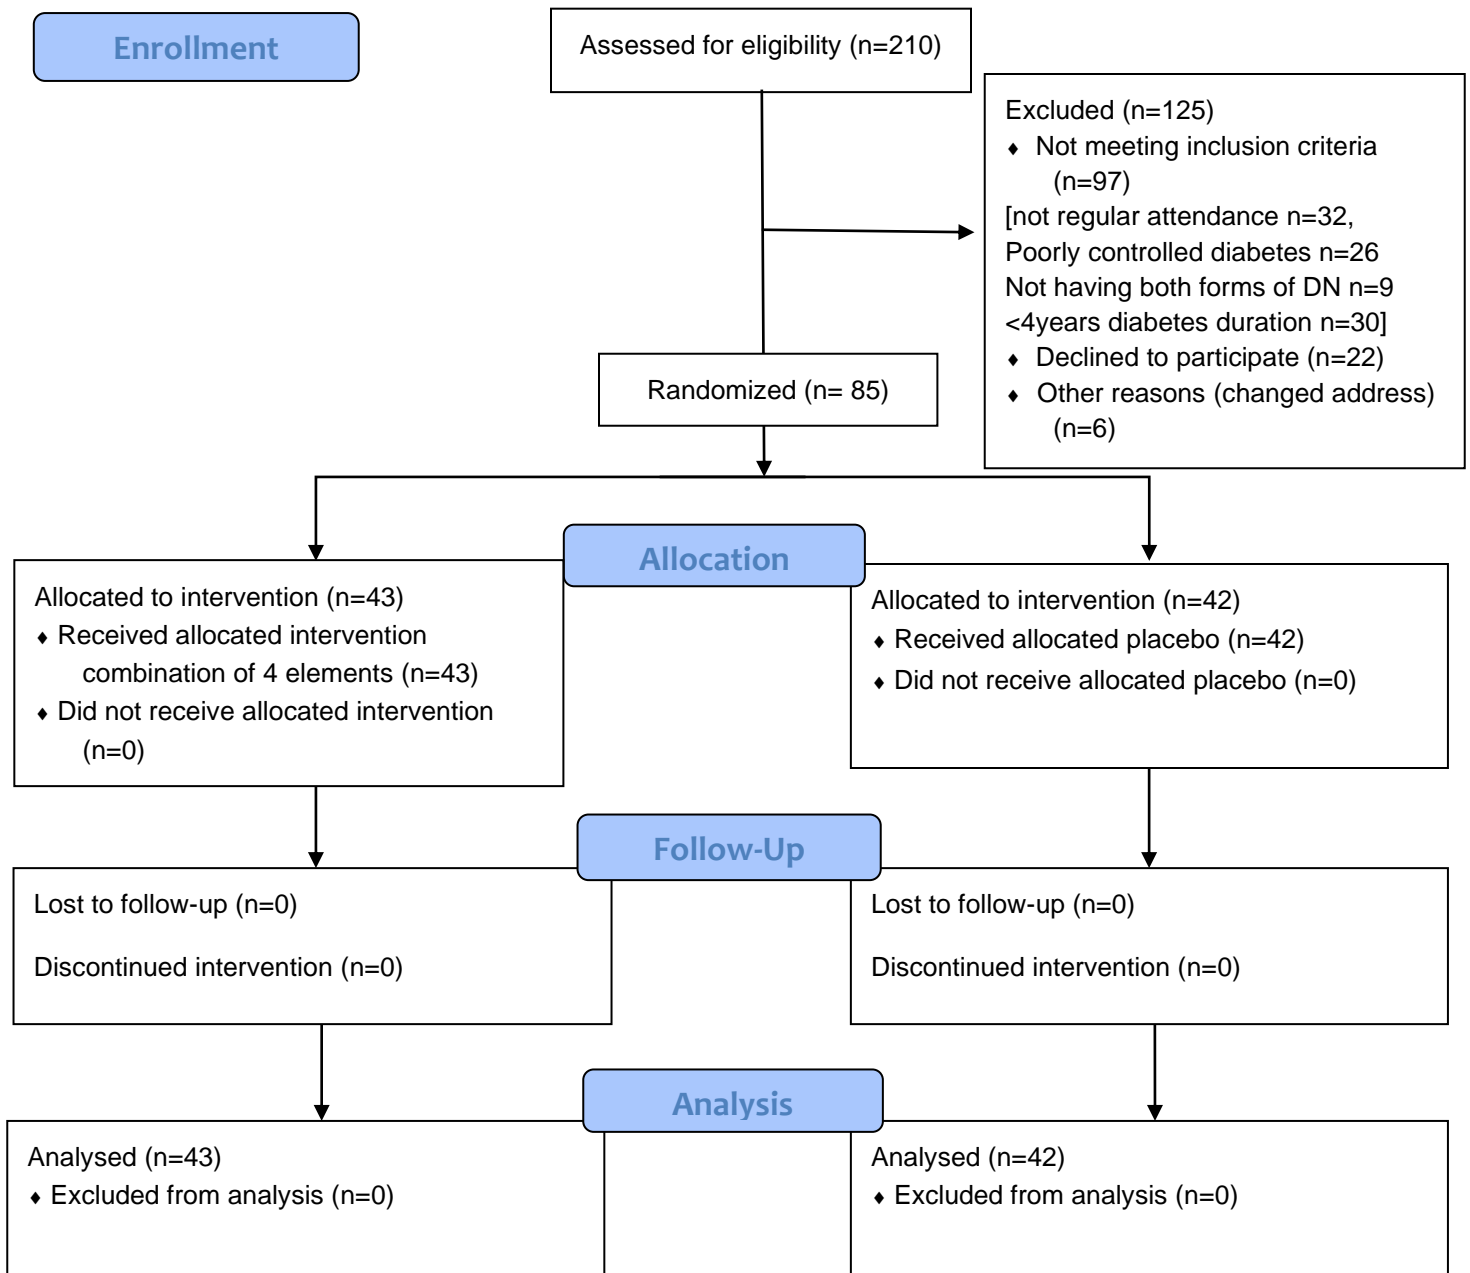

Supplement: nutrients-12-03254-s001.pdf [file nutrients-12-03254-s001.pdf]
